# Supplementary material for: Higher Sensitivity of Soil Microbial Network Than Community Structure under Acid Rain
Source: PubMed Central journal article supplement (PMC7825572; doi:10.3390/microorganisms9010118), 2021-01-06
Supplement: microorganisms-09-00118-s001.pdf [file microorganisms-09-00118-s001.pdf]

## Supplementary Materials

**Table S1.** Primers used for PCR amplification of archaeal and bacterial *amoA*, *nirS* and *nosZ* genes sequences.

| Functional genes | Primer name   | Sequence (5'-3')             | PCR conditions                                            | Reference                 |
|------------------|---------------|------------------------------|-----------------------------------------------------------|---------------------------|
| <i>AOA-amoA</i>  | Arch-amoA26F  | GACTACATMTTCTAYACWGAYTGGGC   | 94°C for 5 min × 1 cycle;                                 | (Park et al., 2008)       |
|                  | Arch-amoA417R | GGKGTCAATRTATGGWGGYAAAYGTTGG | 94°C for 30 s, 53°C for 30 s, 72 °C for 60 s × 35 cycles; |                           |
| <i>AOB-amoA</i>  | amoA-1F       | GGGGTTTCTACTGGTGGT           | 72 °C for 7 min × 1 cycle                                 | (Rotthauwe et al., 1997)  |
|                  | amoA-2R       | CCCCTCKGSAAAGCCTTCTTC        | 94°C for 30 s, 50°C for 30 s, 72 °C for 60 s × 35 cycles; |                           |
| <i>nirS</i>      | Cd3aF         | G TSAACG TSAAGGARACSGG       | 72 °C for 7 min × 1 cycle                                 | (ThrobbÃ Ck et al., 2004) |
|                  | R3cd          | GASTTCGGRTGSGTCTTGA          | 94°C for 5 min × 1 cycle;                                 |                           |
| <i>nosZ</i>      | nosZ-F        | CGYTGTTCMTCGACAGCCAG         | 94°C for 30 s, 57°C for 30 s, 72 °C for 60 s × 30 cycles; | (Kloos et al., 2001)      |
|                  | nosZ1622R     | CGSACCTTSTTGCCSTYGCG         | 72 °C for 7 min × 1 cycle                                 |                           |
|                  |               |                              | 94°C for 5 min × 1 cycle;                                 |                           |
|                  |               |                              | 94°C for 60 s, 63°C for 30 s, 72 °C for 60 s × 35 cycles; |                           |
|                  |               |                              | 72 °C for 7 min × 1 cycle                                 |                           |

## REFERENCES

- Kloos, K., Mergel, A., Rösch, C., Bothe, H. (2001). Denitrification within the genus *Azospirillum* and other associative bacteria. *Australian Journal of Plant Physiology*. 28, 991-998
- Park, S., Park, B., Rhee, S. (2008). Comparative analysis of archaeal 16S rRNA and *amoA* genes to estimate the abundance and diversity of ammonia-oxidizing archaea in marine sediments. *Extremophiles*. 12, 605-615
- Rotthauwe, J.H., Witzel, K.P., Liesack, W. (1997). The ammonia monooxygenase structural gene *amoA* as a functional marker: Molecular fine-scale analysis of natural ammonia-oxidizing populations. *Appl. Environ. Microb.* 63, 4704-4712
- Throback, I.N., Enwall, K., Jarvis, A.S., Hallin, S. (2004). Reassessing PCR primers targeting *nirS*, *nirK* and *nosZ* genes for community surveys of denitrifying bacteria with DGGE. *FEMS Microbiol. Ecol.* 49, 401-417

**Table S2.** Soil chemical properties among treatments (mean  $\pm$  SE,  $n = 5$ ).

|                  | pH              | AP<br>mg kg <sup>-1</sup> | AK<br>mg kg <sup>-1</sup> | AN<br>mg kg <sup>-1</sup> | NH <sub>4</sub> <sup>+</sup> -N<br>mg kg <sup>-1</sup> | NO <sub>3</sub> <sup>-</sup> -N<br>mg kg <sup>-1</sup> | TC<br>g kg <sup>-1</sup> | TN<br>g kg <sup>-1</sup> | TC/TN           |
|------------------|-----------------|---------------------------|---------------------------|---------------------------|--------------------------------------------------------|--------------------------------------------------------|--------------------------|--------------------------|-----------------|
| CK               | 5.11 $\pm$ 0.07 | 5.3 $\pm$ 1.3             | 51.3 $\pm$ 7.2            | 62.9 $\pm$ 5.6            | 4.70 $\pm$ 0.96                                        | 4.91 $\pm$ 0.74                                        | 11.2 $\pm$ 0.1           | 2.10 $\pm$ 0.03          | 5.31 $\pm$ 0.04 |
| AR               | 4.71 $\pm$ 0.12 | 11.3 $\pm$ 3.3            | 46.6 $\pm$ 5.6            | 63.8 $\pm$ 1.1            | 5.52 $\pm$ 0.15                                        | 5.35 $\pm$ 0.20                                        | 11.6 $\pm$ 0.3           | 1.99 $\pm$ 0.01          | 5.81 $\pm$ 0.16 |
| <i>p</i> -values | <b>0.021*</b>   | 0.128                     | 0.625                     | 0.890                     | 0.447                                                  | 0.586                                                  | 0.255                    | <b>0.004**</b>           | <b>0.030*</b>   |

CK: control, AR: acid rain with pH of 4.0. AP: available phosphorus; AK: available potassium; AN: alkaline nitrogen; NH<sub>4</sub><sup>+</sup>-N: ammonium nitrogen; NO<sub>3</sub><sup>-</sup>-N: nitrate nitrogen; TC: total carbon; TN: total nitrogen. The *p*-values refer to the independent-samples t-test results. \*\* Different at  $p < 0.01$ , \* Different at  $p < 0.05$ , <sup>ns</sup> Non-different.

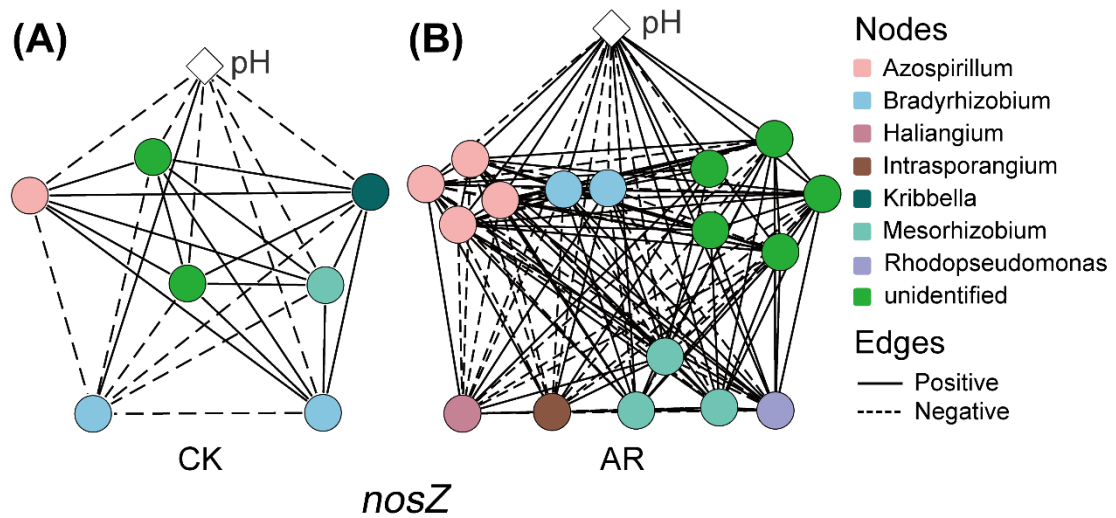

**Figure S1.** Subnetwork of microbial taxa and soil pH in CK **(A)** and AR **(B)** treatments. Connections stand for Spearman's correlation with  $r > 0.7$  and statistically significant at  $p < 0.05$ . Nodes represent OTUs and soil factors with different shapes, and OTUs are colored by genus-level taxonomy. *nosZ*: denitrifiers harbouring *nosZ* gene.

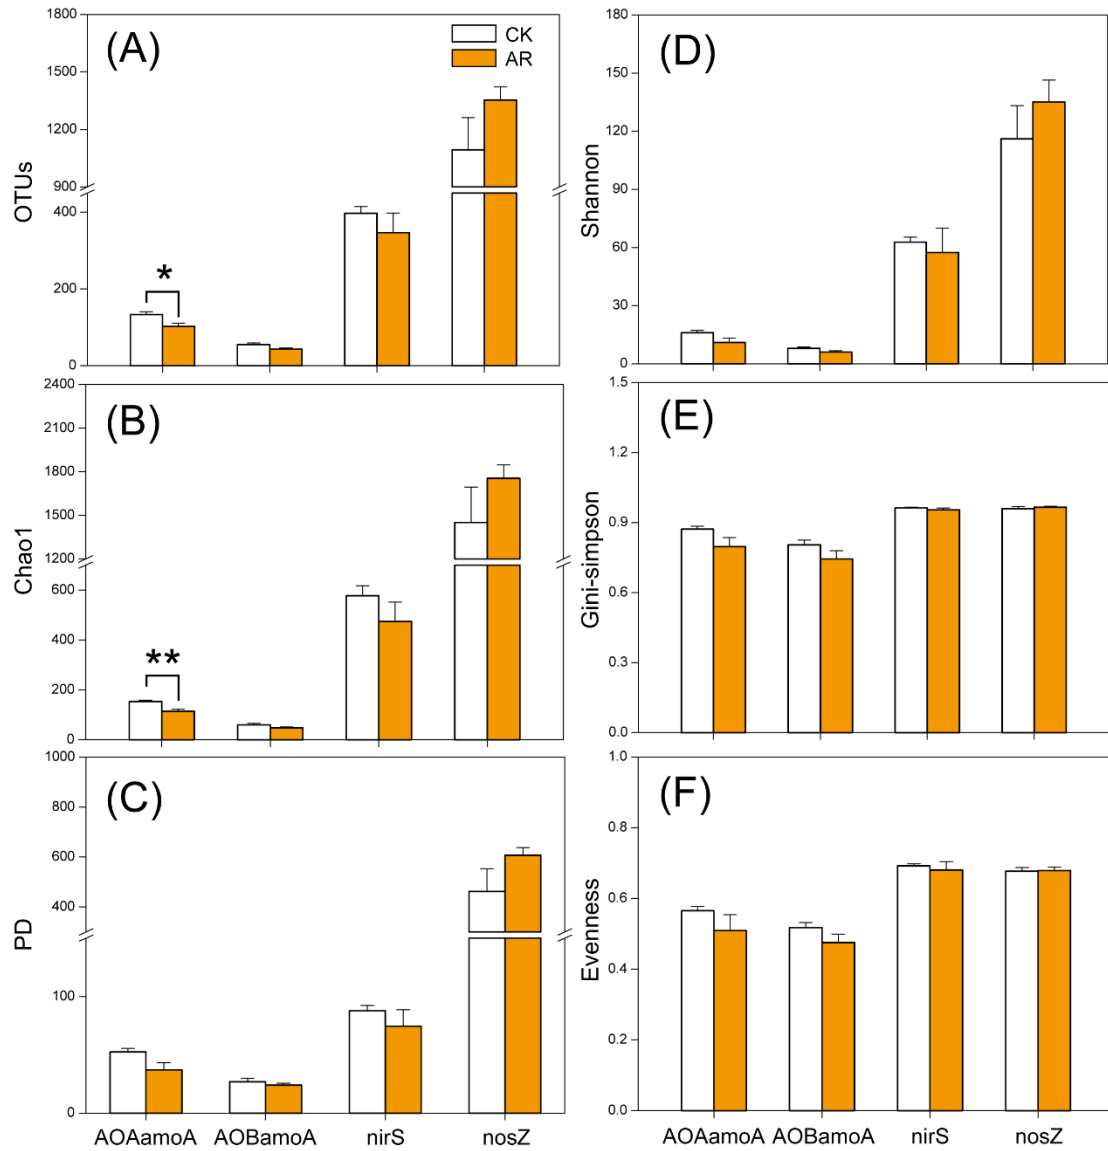

**Figure S2.** The microbial community richness and diversity indices of functional genes among treatments. OTUs: observed number of OTUs (A); Chao1: Chao1 richness index (B); PD: phylogenetic diversity index (C); Shannon: Shannon diversity index (D); Gini-Simpson: Gini-Simpson index (E); Evenness: Shannon's evenness index (F). CK: non-acid addition, AR: pH 4.0 acid rain. Data were presented as mean ± standard error ( $n = 5$ ). \*\*  $p < 0.01$ , \*  $p < 0.05$ .

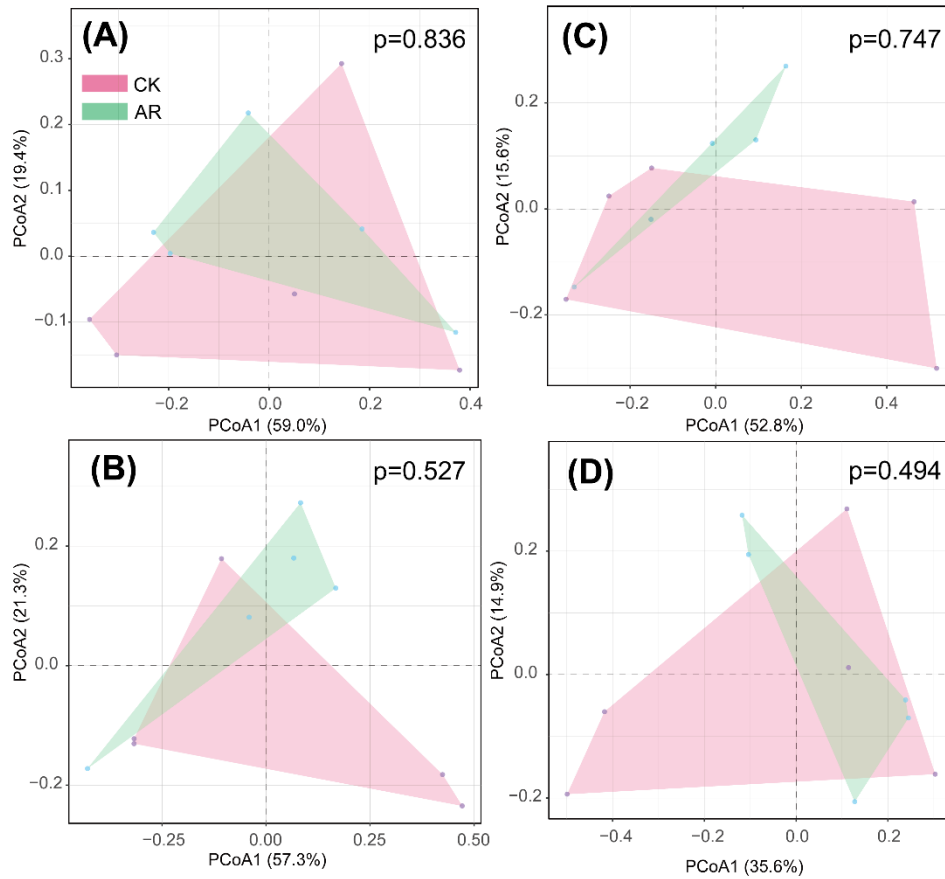

**Figure S3.** The principle coordinate analysis (PCoA) of the microbial communities structure of AOA (A), AOB (B), *nirS*-harboring denitrifiers (C) and *nosZ*-harboring denitrifiers (D). CK: non-acid addition, AR: acid rain of pH 4.0. Five points in the same color block represent one treatment. The *p*-values refer to PERMANOVA results.

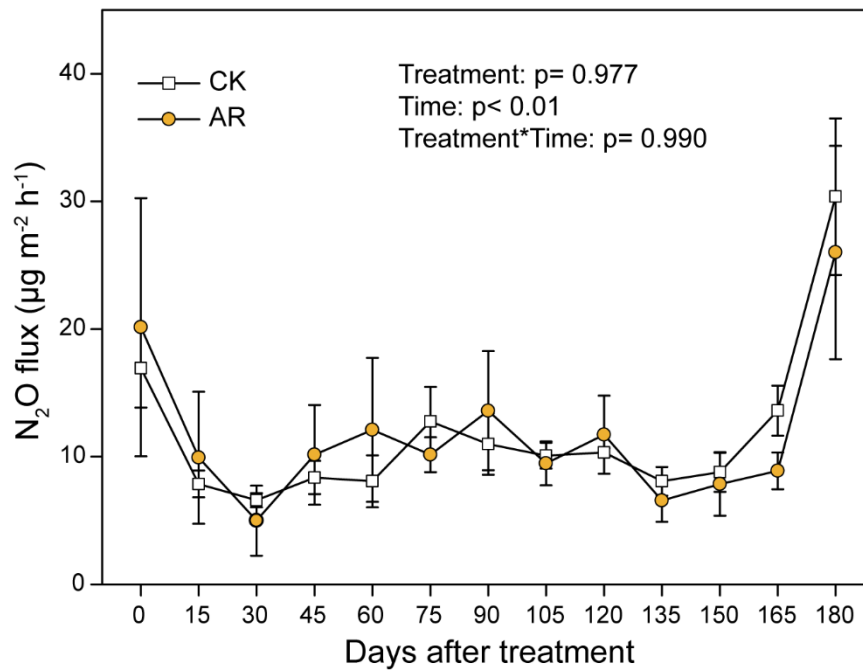

**Figure S4.** N<sub>2</sub>O fluxes over sampling time. CK: non-acid addition, AR: pH 4.0 acid rain. Data were presented as mean  $\pm$  standard error ( $n = 5$ ).
